# Supplementary material
Source: PubMed Central journal article supplement (PMC4431940)
Supplement: NIHMS672580-supplement-Supplemental_Data_File___doc___tif__pdf__etc___2.pdf [file NIHMS672580-supplement-Supplemental_Data_File___doc___tif__pdf__etc___2.pdf]

Supplemental Digital Content – 2

Table 1:

| <b>Slopes of trends across time of each level of age, payment and admission type</b> |                   |                     |                    |                |               |               |                 |
|--------------------------------------------------------------------------------------|-------------------|---------------------|--------------------|----------------|---------------|---------------|-----------------|
|                                                                                      |                   |                     | <b>% Discharge</b> |                |               |               |                 |
| <b>Dataset</b>                                                                       | <b>Group name</b> | <b>Discharge to</b> | <b>Estimate</b>    | <b>Std Err</b> | <b>CI</b>     | <b>Pvalue</b> | <b>Estimate</b> |
| age                                                                                  | 18-64             | Home                | -0.176             | 0.016          | (-0.21--0.14) | 6.31E-08      | -0.0082575      |
| age                                                                                  | 65-79             | Home                | -0.451             | 0.044          | (-0.54--0.37) | 1.27E-07      | -0.0677121      |
| age                                                                                  | >80               | Home                | -0.618             | 0.081          | (-0.78--0.46) | 3.66E-06      | -0.0887429      |
| age                                                                                  | 18-64             | PAC                 | 8.621              | 0.788          | (7.08-10.17)  | 6.31E-08      | -0.0232671      |
| age                                                                                  | 65-79             | PAC                 | 2.994              | 0.291          | (2.42-3.56)   | 1.27E-07      | -0.0905536      |
| age                                                                                  | >80               | PAC                 | 1.269              | 0.166          | (0.94-1.59)   | 3.66E-06      | -0.0941929      |
| payment                                                                              | Medicare          | Home                | -0.410             | 0.041          | (-0.49--0.33) | 1.60E-07      | -0.0819821      |
| payment                                                                              | Medicaid          | Home                | -0.143             | 0.022          | (-0.19--0.1)  | 2.16E-05      | -0.0233703      |
| payment                                                                              | Private           | Home                | -0.098             | 0.021          | (-0.14--0.06) | 0.00039541    | -0.0074978      |
| payment                                                                              | Medicare          | PAC                 | 4.575              | 0.453          | (3.69-5.46)   | 1.60E-07      | -0.1071971      |
| payment                                                                              | Medicaid          | PAC                 | 3.281              | 0.508          | (2.28-4.28)   | 2.16E-05      | -0.0101913      |
| payment                                                                              | Private           | PAC                 | 3.875              | 0.820          | (2.27-5.48)   | 0.00039541    | 0.02696255      |
| admission                                                                            | Elective          | Home                | -0.216             | 0.035          | (-0.28--0.15) | 0.00024733    | 0.00666268      |
| admission                                                                            | Non-elective      | Home                | -0.283             | 0.025          | (-0.33--0.23) | 3.57E-06      | 0.00278939      |
| admission                                                                            | Elective          | PAC                 | 6.511              | 1.043          | (4.47-8.55)   | 0.00024733    | 0.01701539      |
| admission                                                                            | Non-elective      | PAC                 | 5.149              | 0.459          | (4.25-6.05)   | 3.57E-06      | 0.0337207       |

**Figure 1:** Trends in length of stay and discharges to post-acute care by diagnosis using alternative loess method

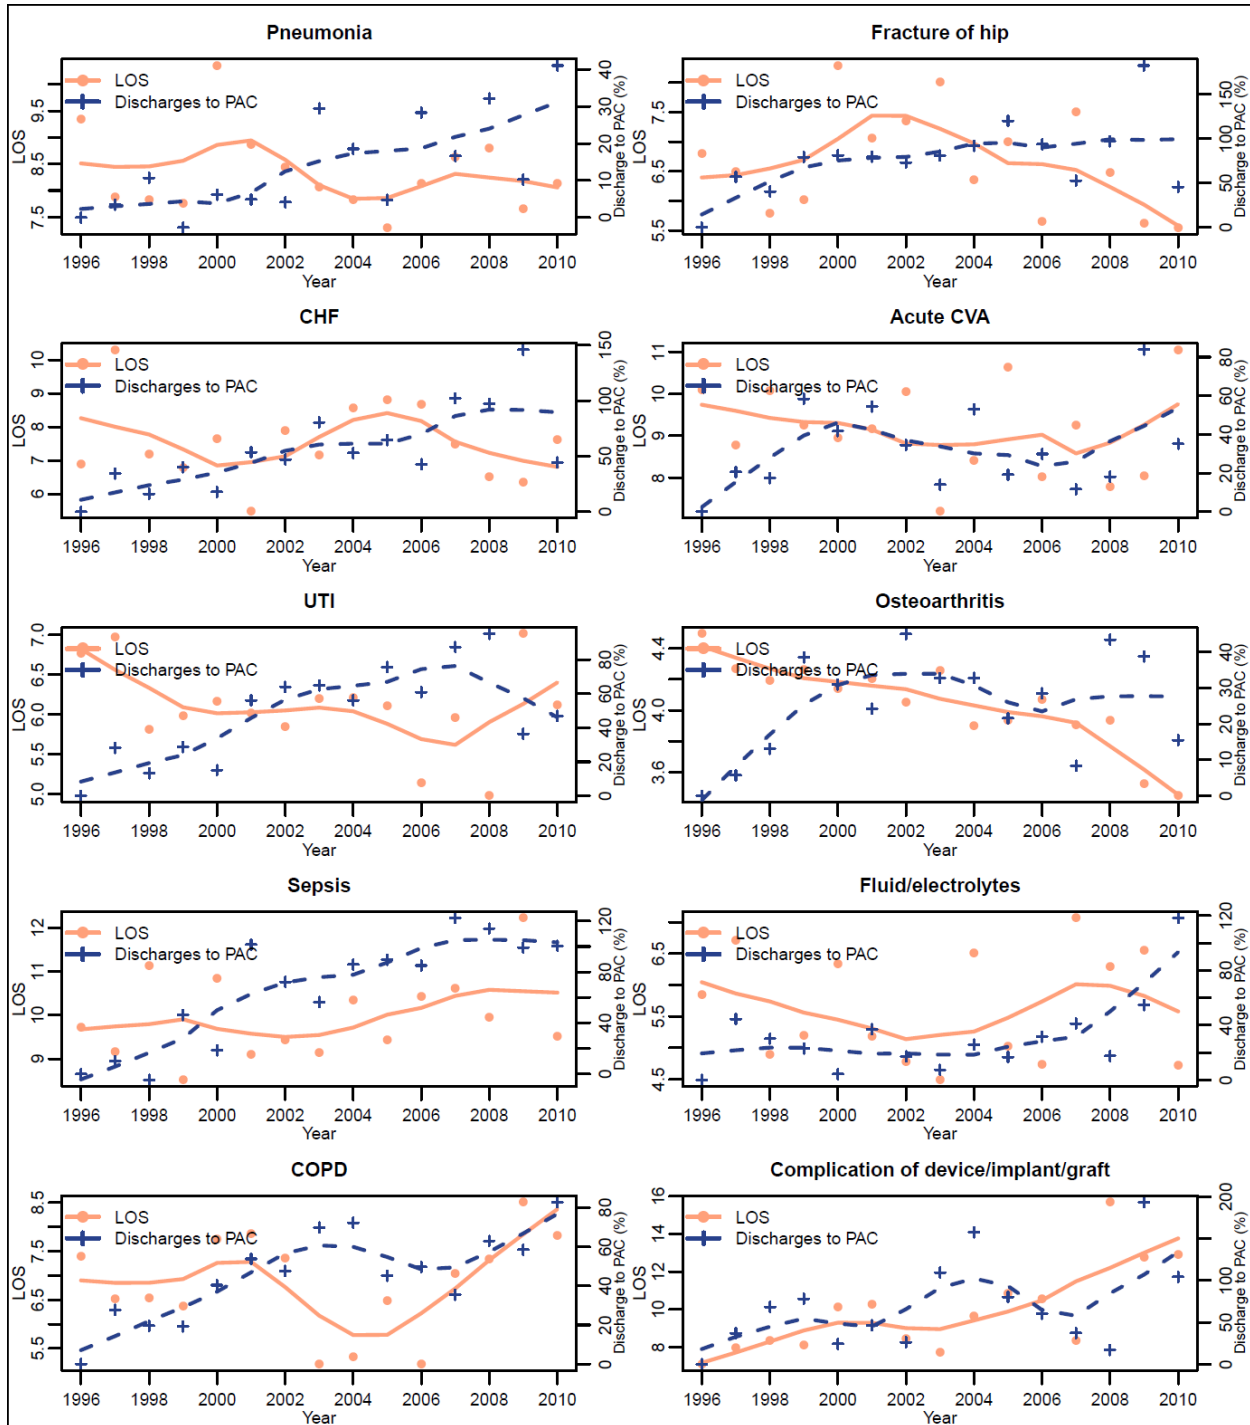

**Legend:** Trends in mean length of stay (left Y-axis, filled circles) and relative percent change in discharge to PAC compared to 1996 levels (right Y-axis, + signs) are displayed over time within each of the ten most common diagnoses associated with discharge to PAC; trend lines are fit

using loess smoothing with span of 0.5 and degree 1 . Trends are adjusted for age and for payor type.

Figure 2: Trends in length of stay and discharges to post-acute care by urgency of admission

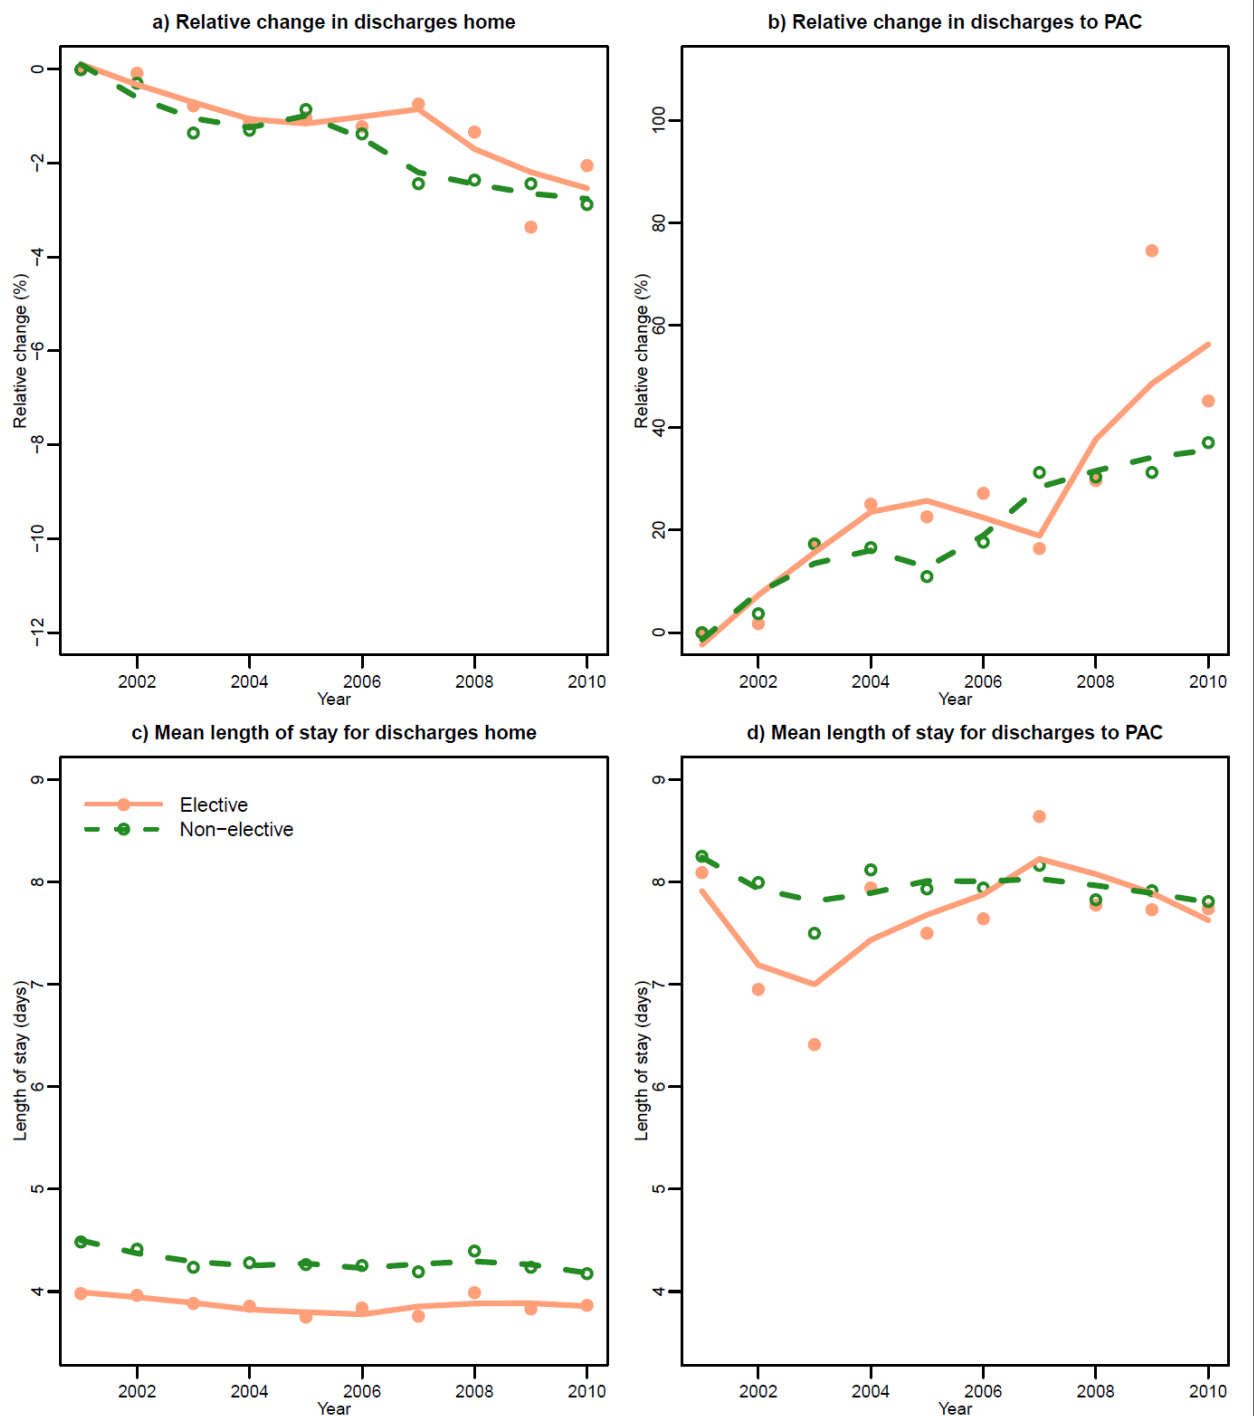

**Legend:** Trends in the percentage of patients discharge home or to post-acute care facilities (PAC) are shown stratified by urgency of admission (elective versus non-elective). Trends are calculated as relative percent change compared to 1996 levels, length of stay is reported as mean number of days. Graphs are smoothing using loess methods.

Figure 3a: Trends in LOS and discharges to PAC within each diagnosis, stratified by payor (Medicare and Medicaid)

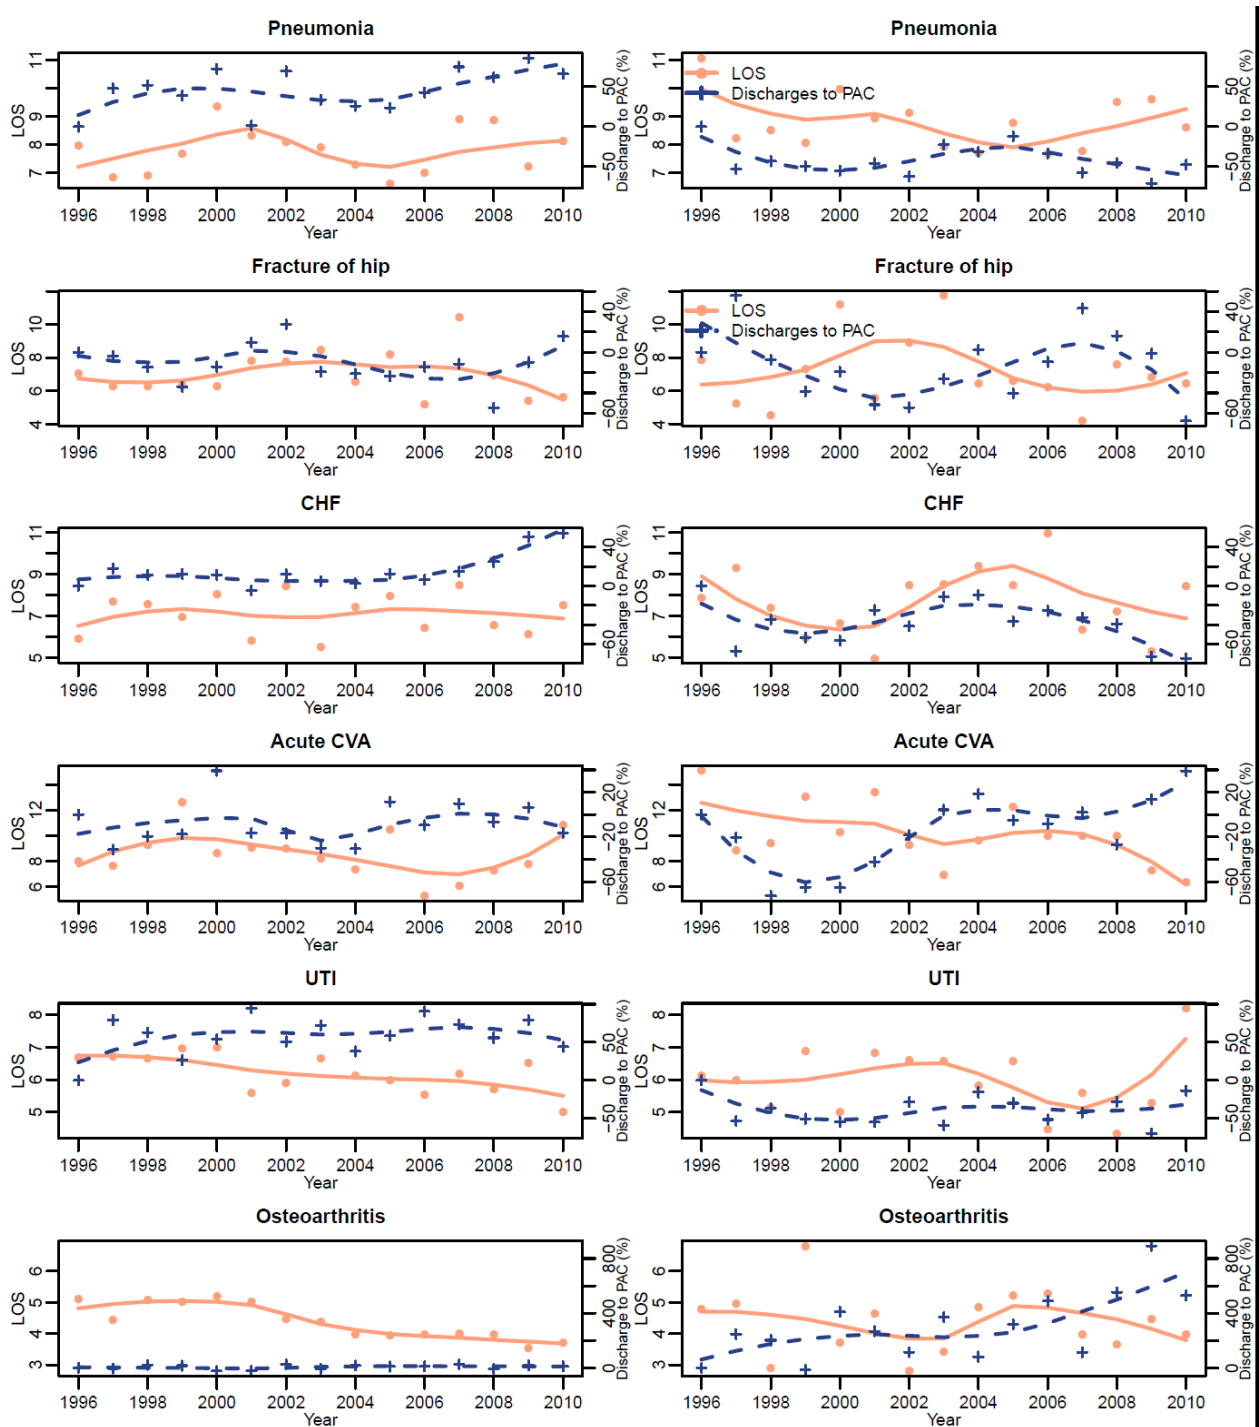

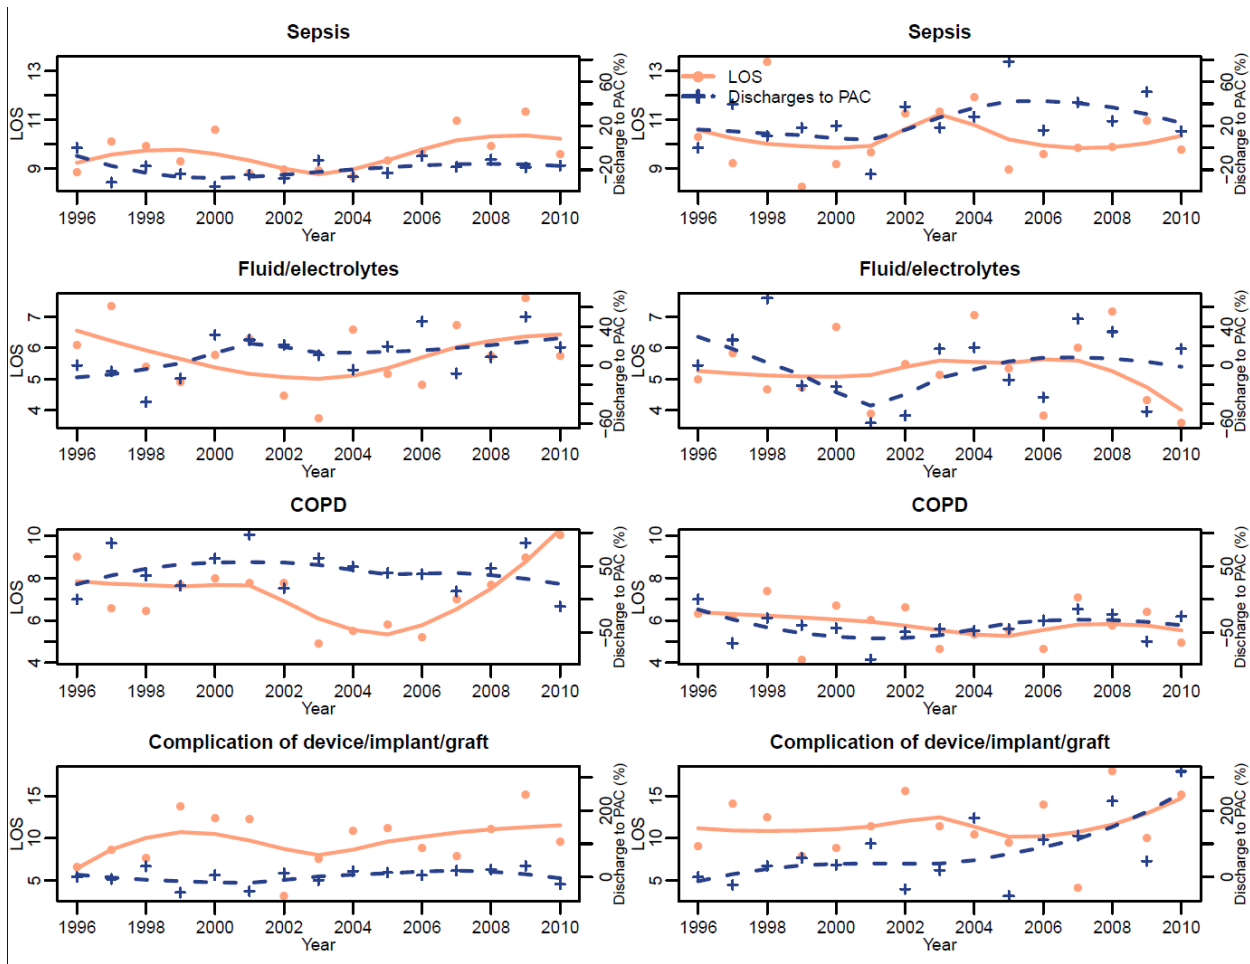

Legend: Trends in mean length of stay (left Y-axis, filled circles) and relative percent change in discharge to PAC compared to 1996 levels (right Y-axis, + signs) are displayed over time within each of the ten most common diagnoses associated with discharge to PAC. **Trends for Medicare (on the left) and Medicaid (on the right) are compared above within each diagnosis group.** Trend lines are fit using loess smoothing with span of 0.75 and degree 2. Trends are adjusted for age.

Figure 3b: Trends in LOS and discharges to PAC within each diagnosis, stratified by payor (Medicaid and private payor)

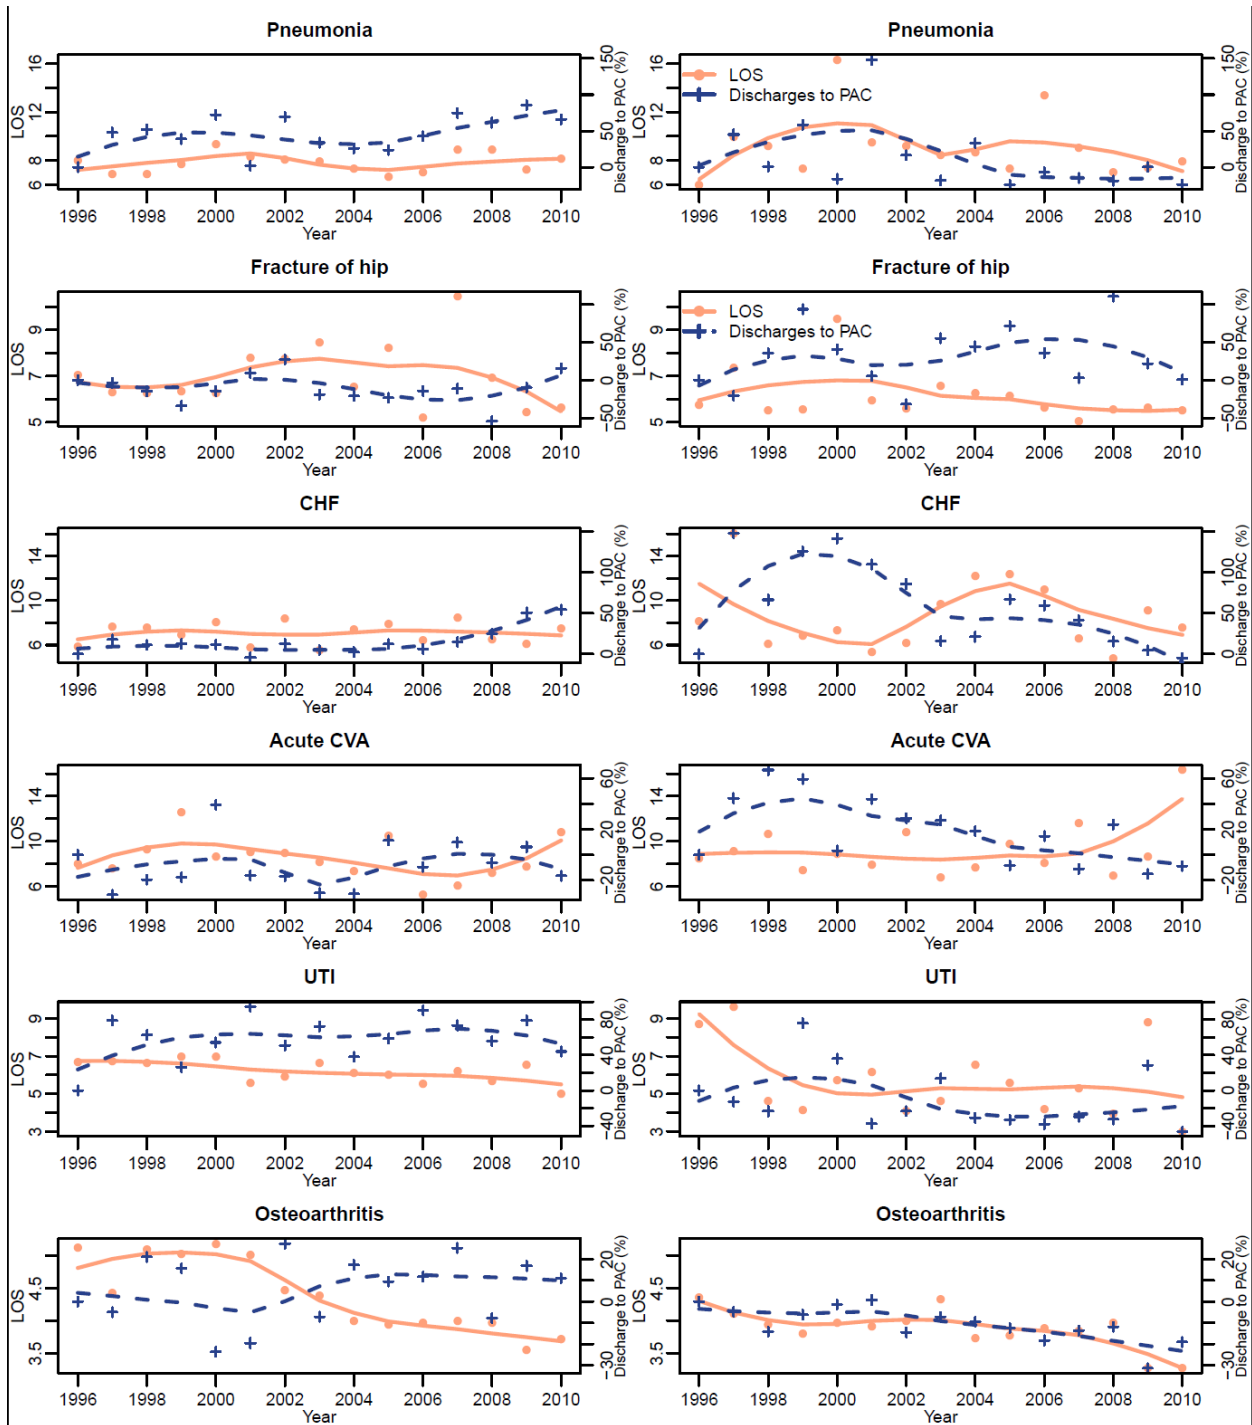

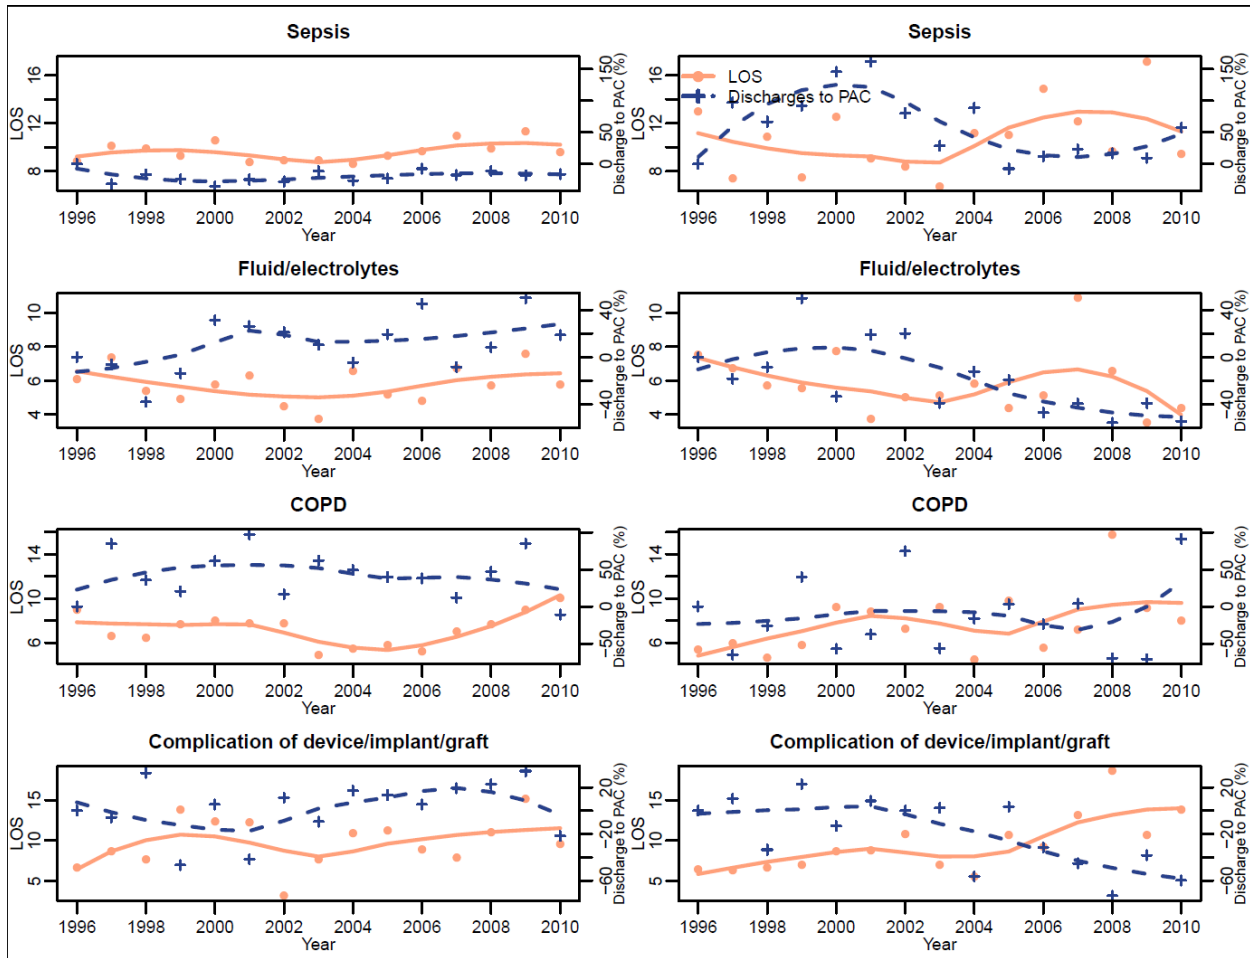

Legend: Trends in mean length of stay (left Y-axis, filled circles) and relative percent change in discharge to PAC compared to 1996 levels (right Y-axis, + signs) are displayed over time within each of the ten most common diagnoses associated with discharge to PAC. **Trends for Medicaid (on the left) and private payors (on the right) are compared above within each diagnosis group.** Trend lines are fit using loess smoothing with span of 0.75 and degree 2. Trends are adjusted for age.
